# Supplementary material for: Direct single-molecule detection of CoA-SH and ATP by the membrane proteins TMEM120A and TMEM120B
Source: Royal Society of Chemistry journal article supplement (doi:10.1039/d3nr05054h), 2024-01-01
Supplement: d3nr05054h2.pdf [file d3nr05054h2.pdf]

## ***Supplementary Information for***

### **Direct single-molecule detection of CoA-SH and ATP by the membrane proteins TMEM120A and TMEM120B**

Changjian Zhao<sup>1, 2#</sup>, Mutian Chen<sup>1, 2#</sup>, Xiaofeng Liu<sup>3</sup>, Weidan Yuan<sup>1</sup>, Kaiju Li<sup>1, 2</sup>, Yu Wang<sup>1, 2</sup>, Chen Chen<sup>1, 2</sup>, Ming Zhang<sup>1</sup>, Yuhan Dong<sup>1, 2</sup>, Yuling Xiao<sup>1</sup>, Dong Deng<sup>3</sup>, Jia Geng<sup>1, 2\*</sup>.

1. Department of Laboratory Medicine, State Key Laboratory of Biotherapy, Med-X Center for Manufacturing, West China Hospital, Sichuan University and Collaborative Innovation Center, Chengdu, 610041, China.
2. Tianfu Jincheng Laboratory, City of Future Medicine, Chengdu 610500, China.
3. Division of Obstetrics, Key Laboratory of Birth Defects and Related Disease of Women and Children of MOE, State Key Laboratory of Biotherapy, West China Second Hospital, Sichuan University, Chengdu, 610041, Sichuan, China.

*#These authors have contributed equally to this work.*

*\*Correspondence to J.G. geng.jia@scu.edu.cn.*

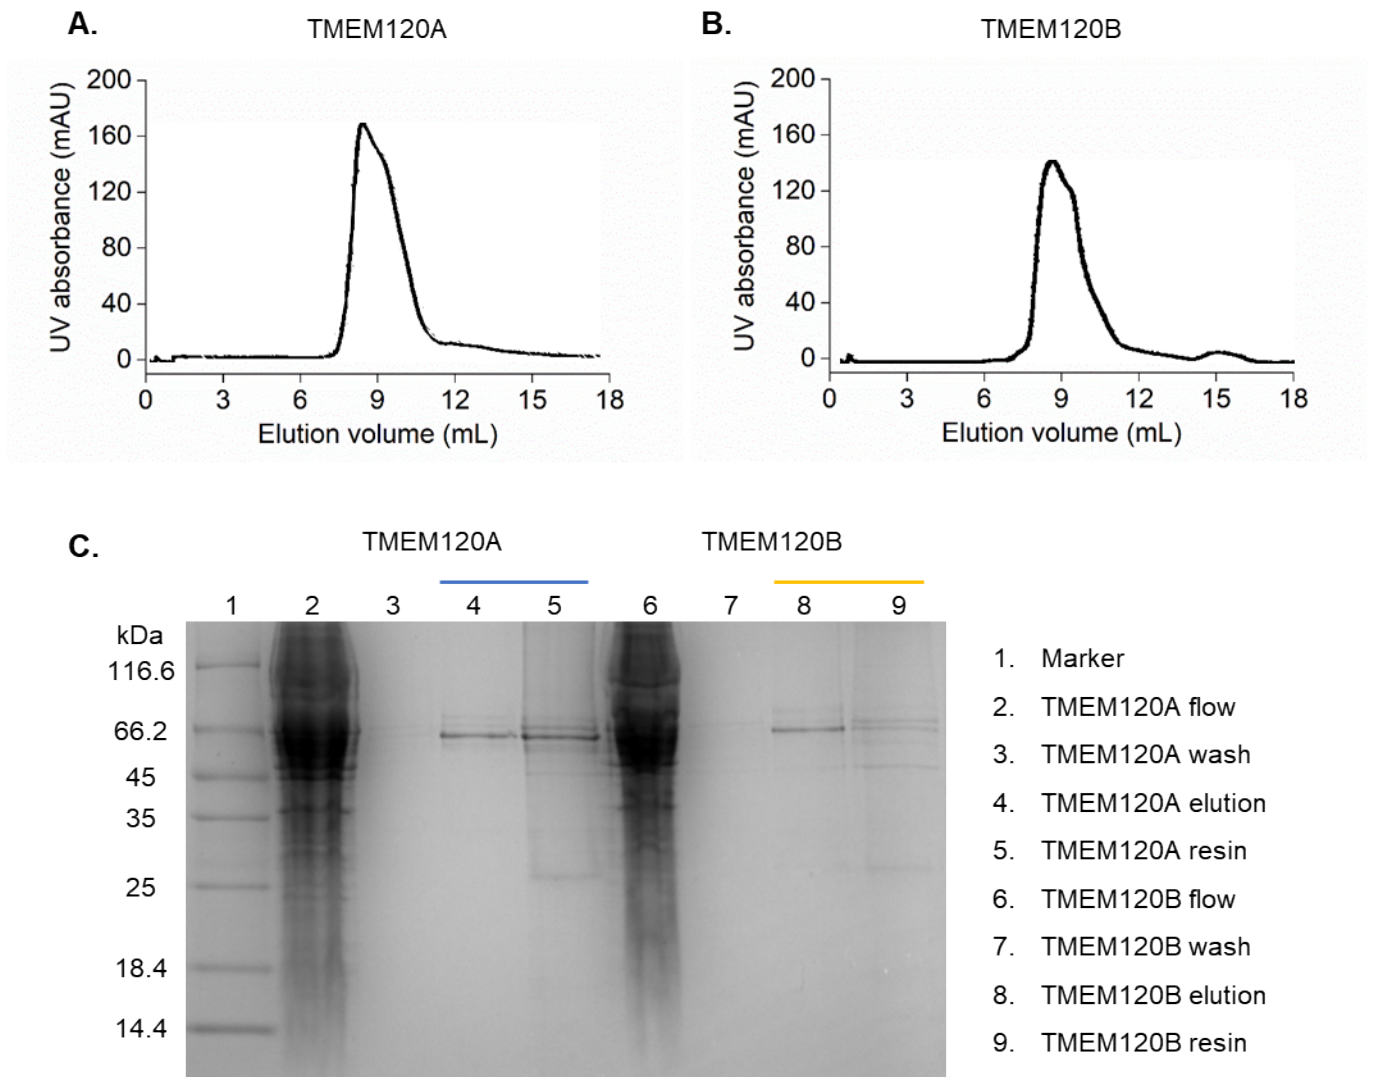

**Figure 1.** Representative chromatogram of gel filtration purification of TMEM120A (**A**) and TMEM120B (**B**). The fractions were analyzed by SDS-PAGE (**C**).

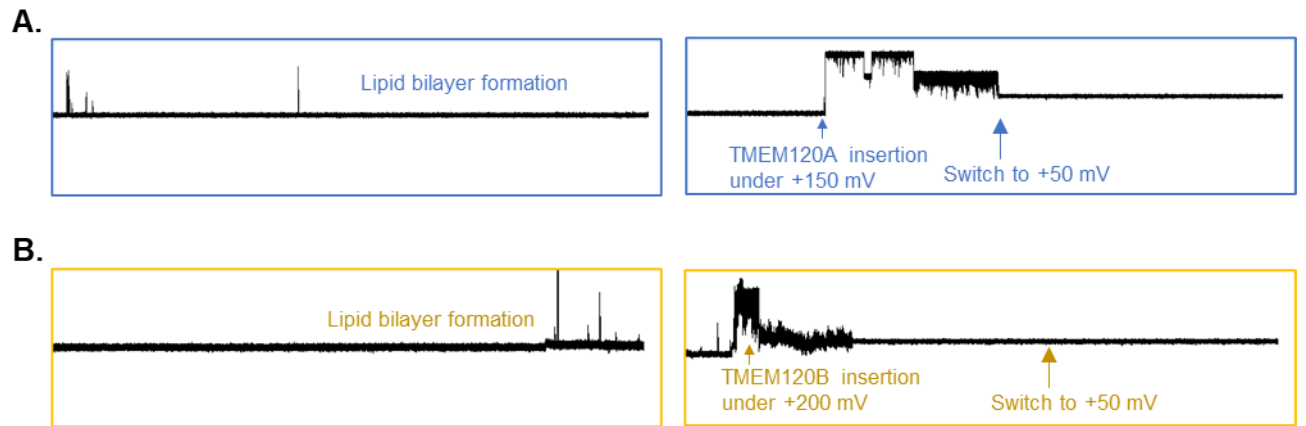

**Figure 2.** Current trace recording of TMEM120A/TMEM120B embedded into lipid bilayer membrane ((-*trans*) 100 mM NaCl - (-*cis*) 500 mM NaCl, 10 mM HEPES, pH 7.5.).

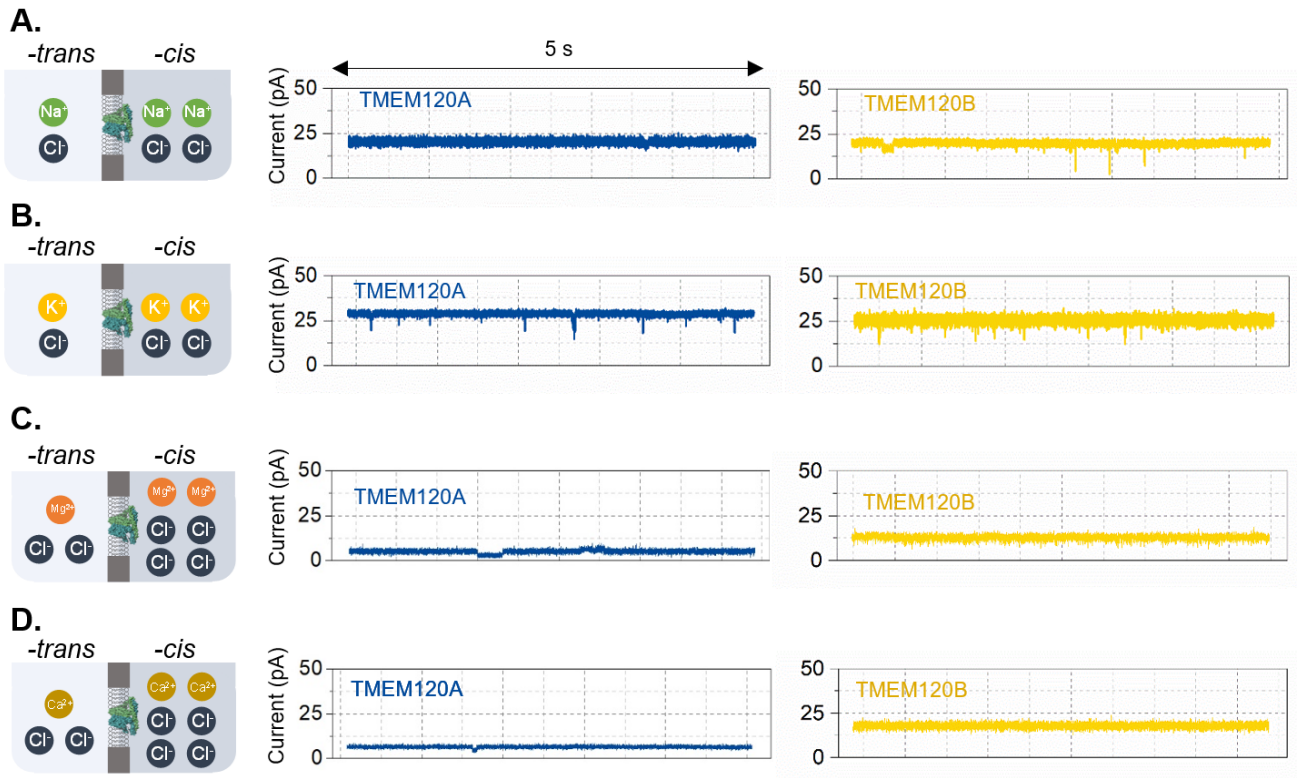

**Figure 3.** Current trace of TMEM120A and TMEM120B under different electrolytes conditions including 100 mM NaCl - 500 mM NaCl (**A**), 100 mM KCl - 500 mM KCl (**B**), 50 mM MgCl<sub>2</sub> - 250 mM MgCl<sub>2</sub> (**C**), 50 mM CaCl<sub>2</sub> - 250 mM CaCl<sub>2</sub> (**D**) (*-trans*) - (*-cis*), voltage: +20 mV).

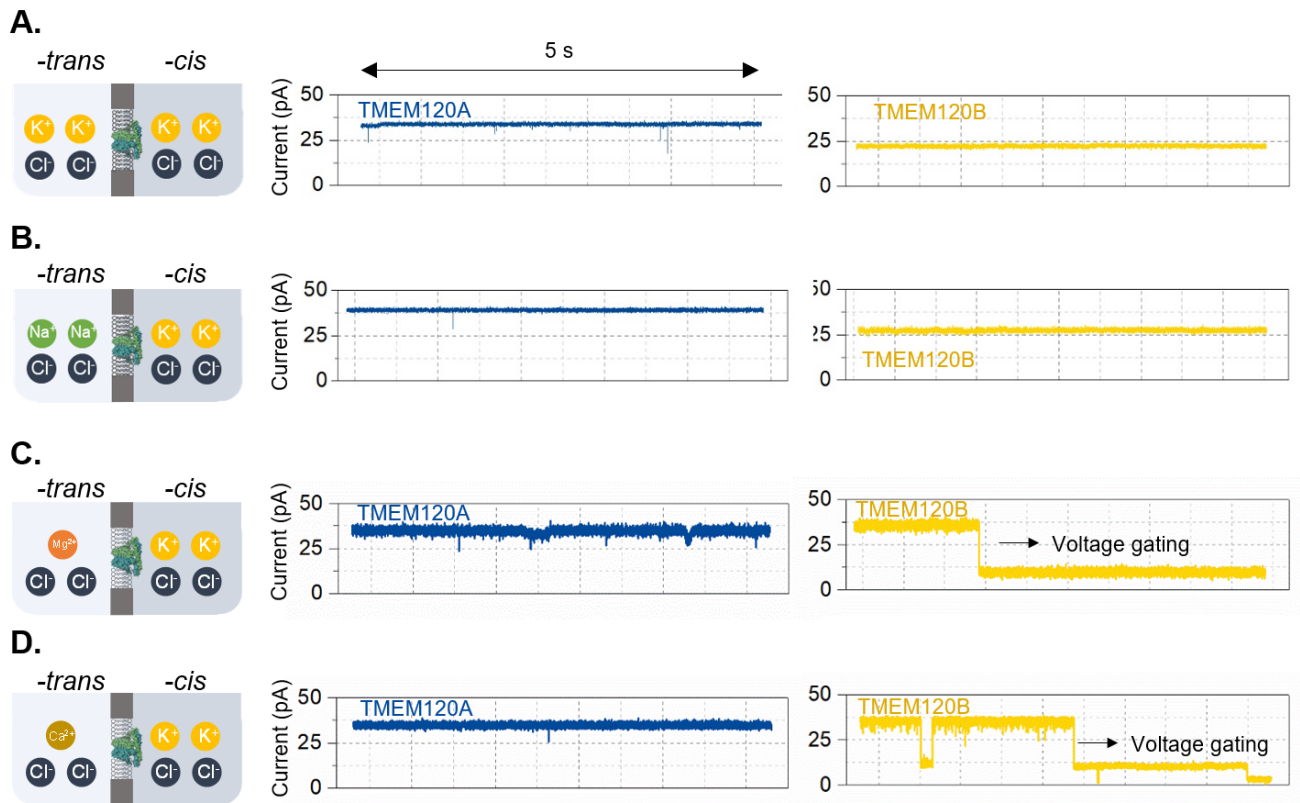

**Figure 4.** Current trace of TMEM120A and TMEM120B under different electrolytes conditions including 500 mM KCl - 500 mM KCl (**A**), 500 mM NaCl - 500 mM KCl (**B**), 250 mM MgCl<sub>2</sub> - 500 mM KCl (**C**) and 250 mM CaCl<sub>2</sub> - 500 mM KCl (**D**) (*-trans*) - (*-cis*), voltage: +20 mV).

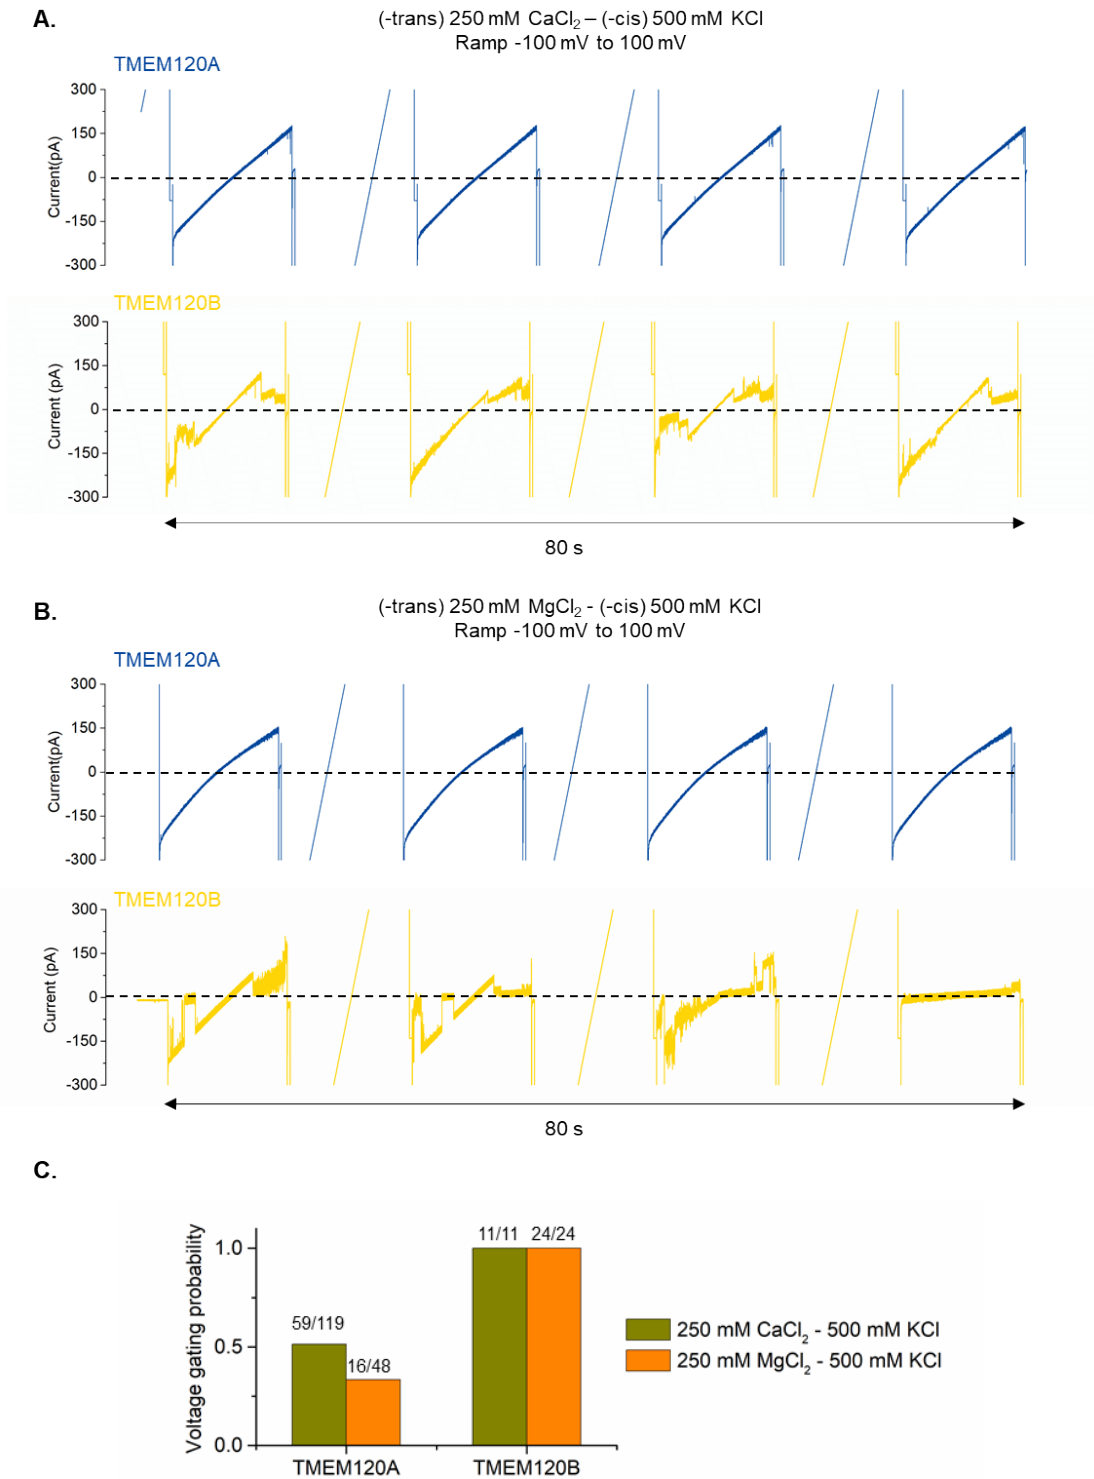

**Figure 5.** TMEM120B present higher voltage-gating probability than TMEM120A in the presence of Ca<sup>2+</sup> and Mg<sup>2+</sup>. **A.** Ion condition: (-*trans*) 250 mM CaCl<sub>2</sub> – (-*cis*) 500 mM KCl, 10 mM HEPES, pH 7.5. **B.** Ion condition: (-*trans*) 250 mM MgCl<sub>2</sub> – (-*cis*) 500 mM KCl, 10 mM HEPES, pH 7.5. **C.** Voltage-gating probability of TMEM120A and TMEM120B under two different electrolyte conditions, with a voltage range from -100 mV to 100 mV.



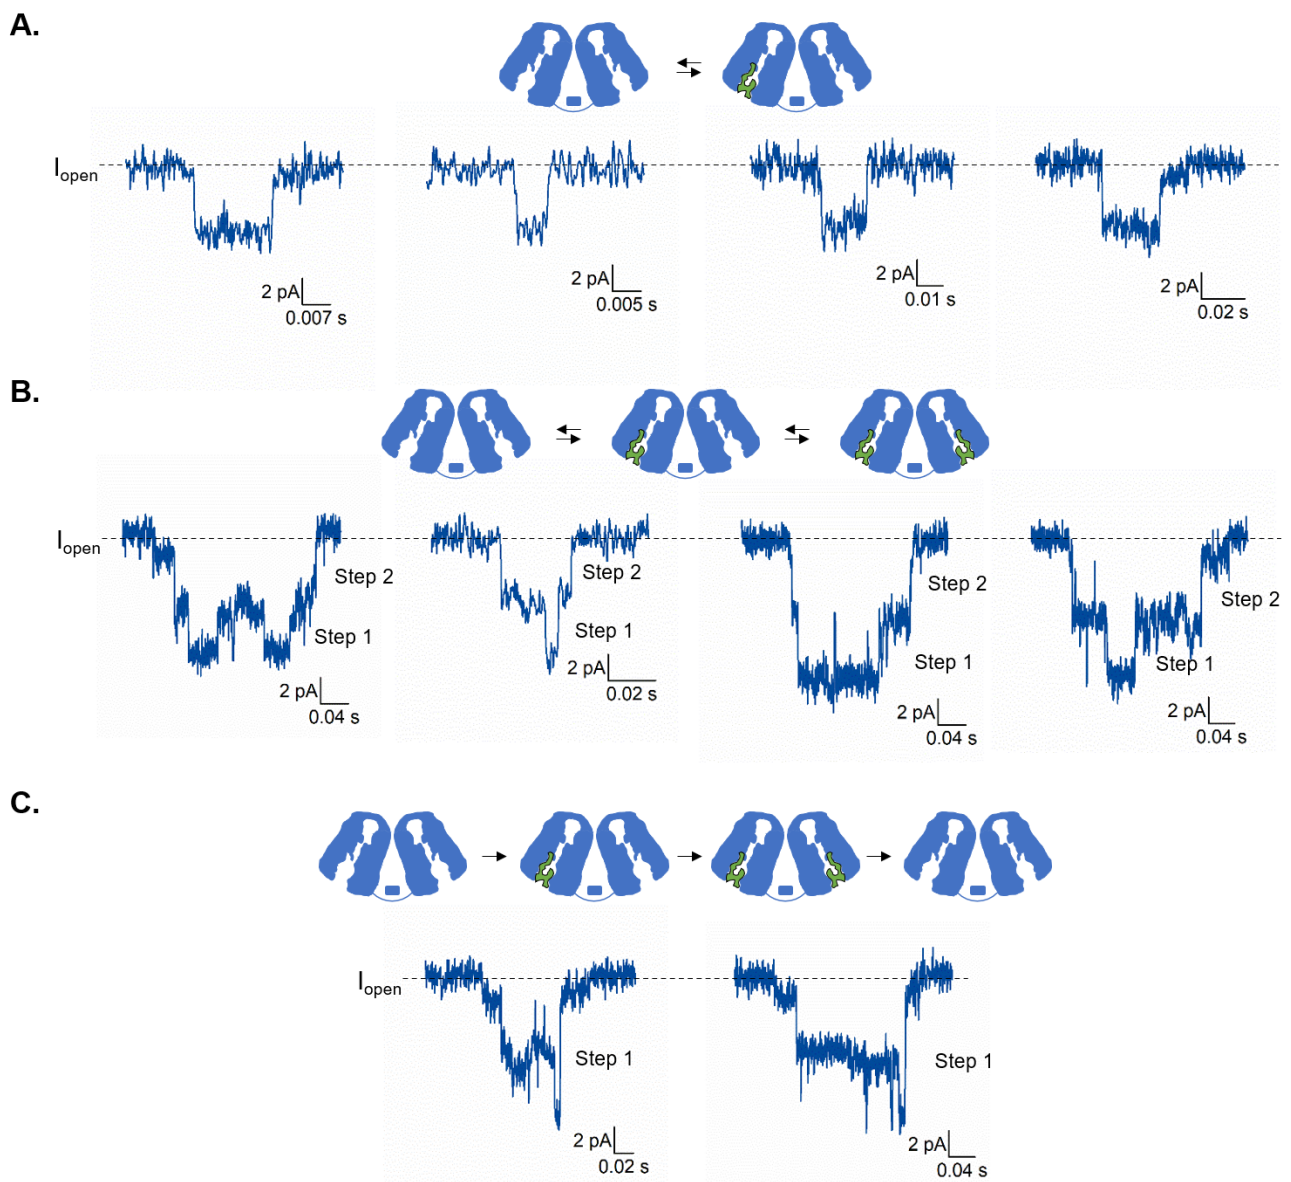

**Figure 6.** Represent signal and possible forms of interaction between COA-SH and TMEM120A. **A.** One-step block signal with relatively low blockage rate. **B.** Two-step block signal with relatively high blockage rate and two-step of dissociation. **C.** Two-step block signal with one step dissociation (+20 mV, (-*trans*) 100 mM NaCl - (-*cis*) 500 mM NaCl, 10 mM HEPES, pH 7.5.).

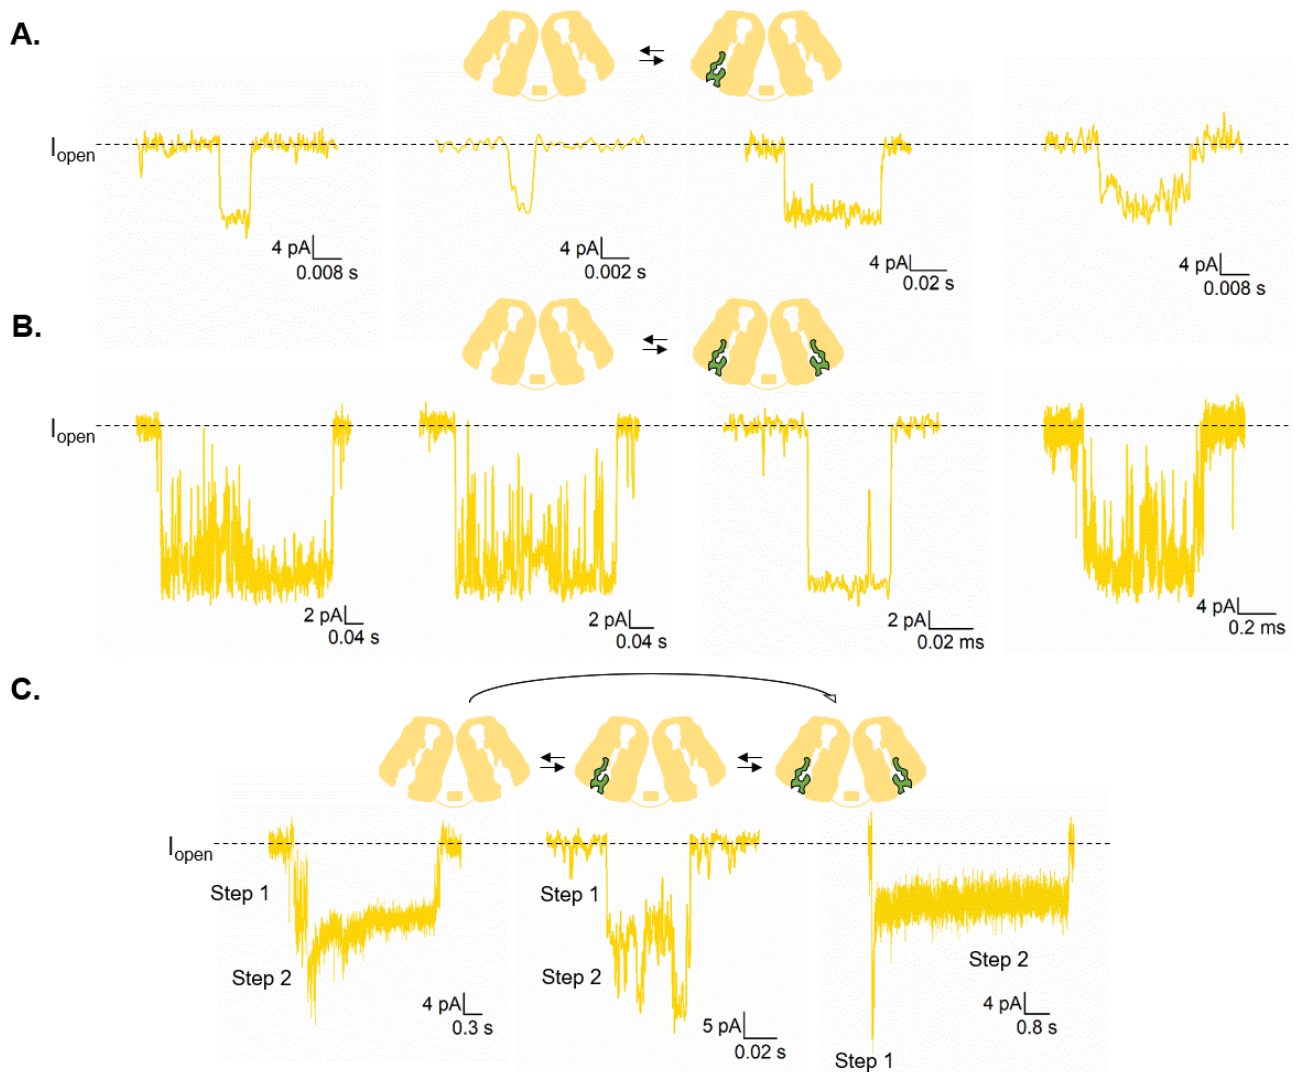

**Figure 7.** Represent signal and possible forms of interaction between COA-SH and TMEM120B. **A.** One-step block signal with relatively low blockage. **B.** One-step block signal with relatively high blockage rate. **C.** Block signal with two steps during block process (+20 mV, (-*trans*) 100 mM NaCl - (-*cis*) 500 mM NaCl, 10 mM HEPES, pH 7.5.).



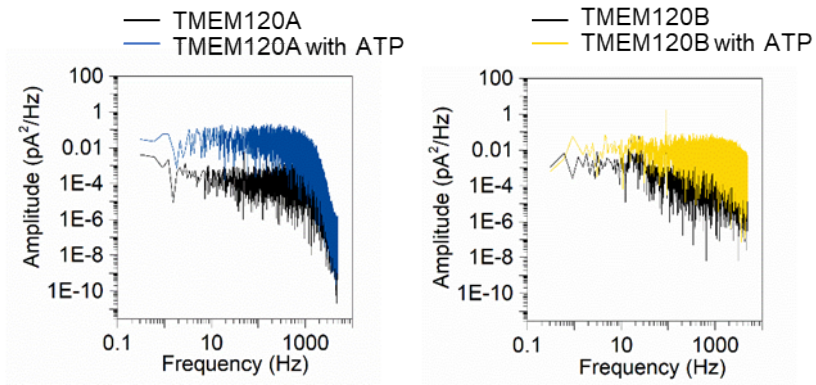

**Figure 8.** Power spectrum analysis of TMEM120A/TMEM120B control (black) and TMEM120A/TMEM120B with 1 mM ATP in the *-cis* side (blue/yellow). The electrolyte buffer is (*-trans*) 250 mM MgCl<sub>2</sub> - (*-cis*) 500 mM KCl. The voltage was +20 mV.

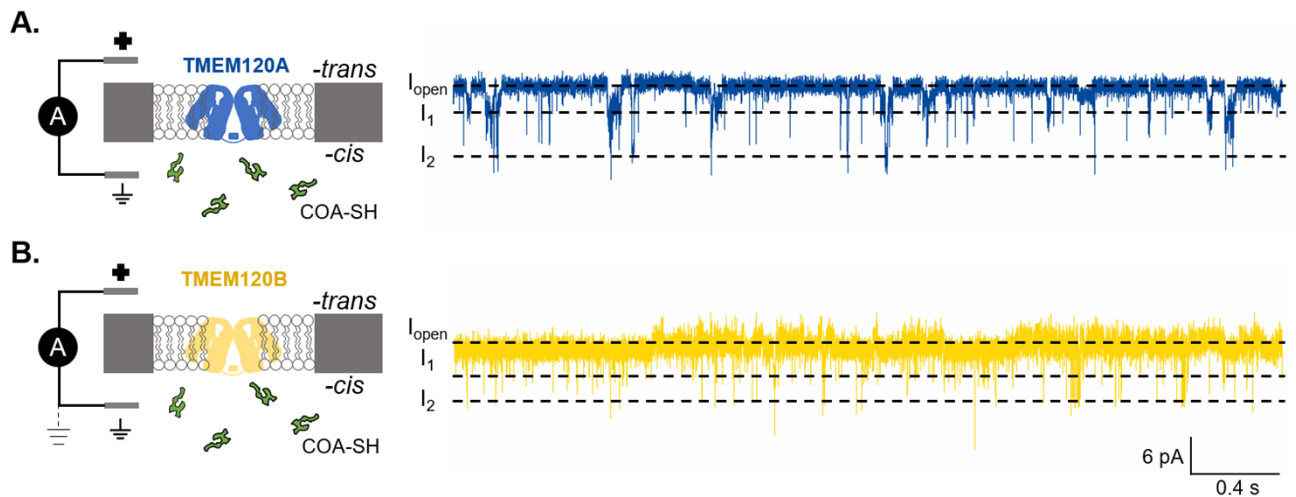

**Figure 9.** Current trace of COA-SH sensing by TMEM120A (blue) and TMEM120B(yellow) under the electrolyte condition of (-*trans*) 250 mM MgCl<sub>2</sub> - (-*cis*) 500 mM KCl. The voltage was +20 mV.
